# Supplementary material for: Functional Characterization of Sugar Beet M14 Antioxidant Enzymes in Plant Salt Stress Tolerance
Source: MDPI journal article supplement (doi:10.3390/antiox12010057), 2022-12-27
Supplement: s1 [file s1]

## *BvM14-DHAR3* transgenic lines

*BvM14-APX*

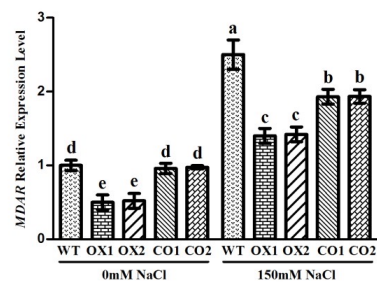

(a)

*BvM14-MDHAR*

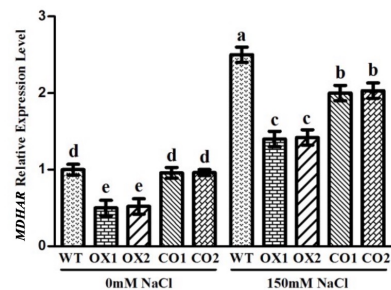

(c)

## *BvM14-MDHAR* transgenic lines

*BvM14-DHAR3*

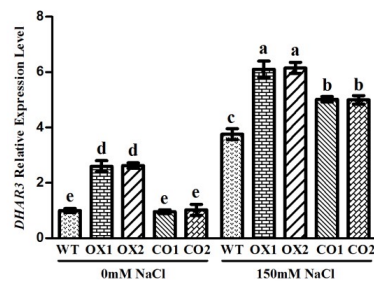

(e)

*BvM14-APX*

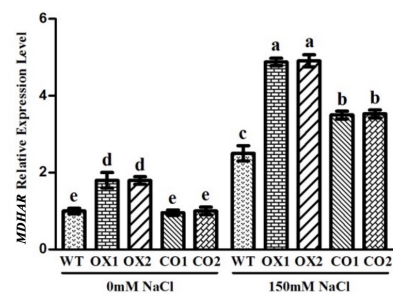

(g)

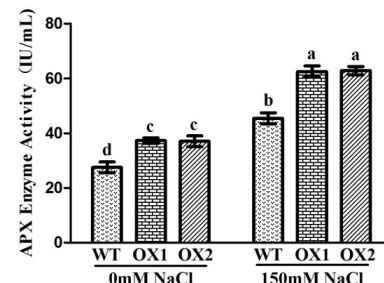

(b)

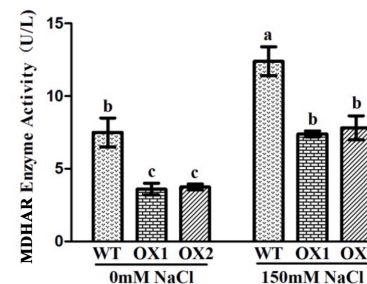

(d)

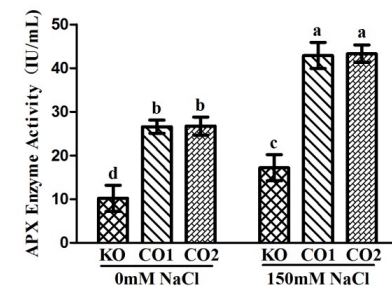

(f)

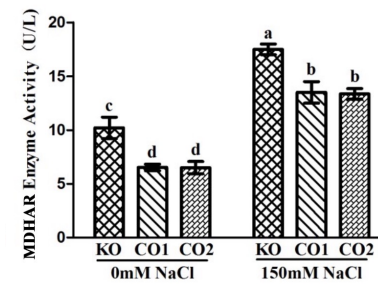

(h)
