# Supplementary material for: Functional Characterization of Sugar Beet M14 Antioxidant Enzymes in Plant Salt Stress Tolerance
Source: MDPI journal article supplement (doi:10.3390/antiox12010057), 2022-12-27
Supplement: s1 [file s1]

*BvM14-CAT*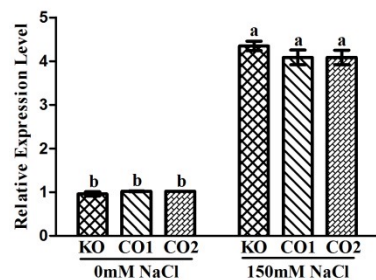

**(a)**

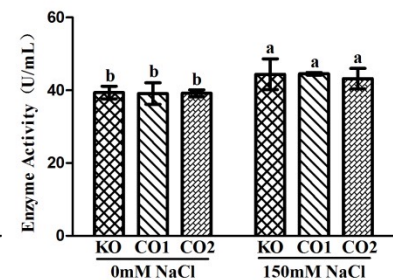

(d)

| NaCl Concentration | Genotype | Relative Expression Level (approx.) | Significance |
|--------------------|----------|-------------------------------------|--------------|
| 0mM NaCl           | WT       | 1.0                                 | b            |
|                    | OX1      | 1.0                                 | b            |
|                    | OX2      | 1.0                                 | b            |
| 150mM NaCl         | WT       | 4.1                                 | a            |
|                    | OX1      | 4.5                                 | a            |
|                    | OX2      | 4.5                                 | a            |

(b)

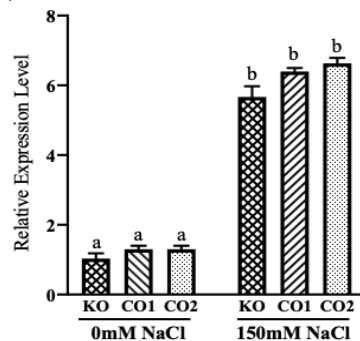

**(b)**

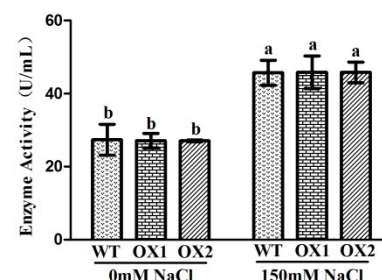

(e)

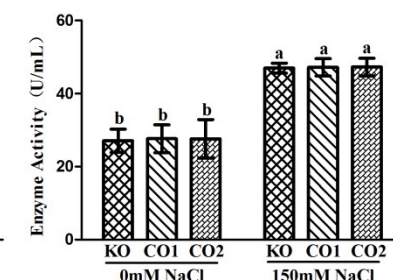

| NaCl Concentration | Genotype | Relative Expression Level (approx.) | Significance Letter |
|--------------------|----------|-------------------------------------|---------------------|
| 0mM NaCl           | WT       | 1.0                                 | d                   |
|                    | OX1      | 1.1                                 | c                   |
|                    | OX2      | 1.1                                 | c                   |
| 150mM NaCl         | WT       | 3.5                                 | b                   |
|                    | OX1      | 4.5                                 | a                   |
|                    | OX2      | 4.4                                 | a                   |

(c)

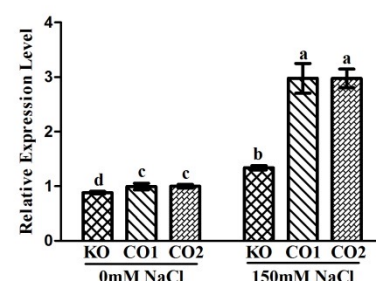

**(f)**

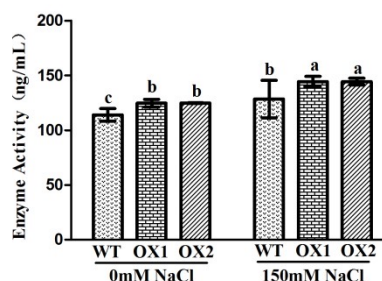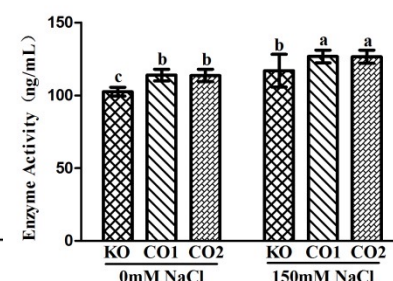

Figure S5
