# Supplementary material for: Functional Characterization of Sugar Beet M14 Antioxidant Enzymes in Plant Salt Stress Tolerance
Source: MDPI journal article supplement (doi:10.3390/antiox12010057), 2022-12-27
Supplement: s1 [file s1]

| Gene name          | Primer sequence                                                          |
|--------------------|--------------------------------------------------------------------------|
| <i>BvM14-DHAR3</i> | <i>BvM14-DHAR3s</i> : 5'-ATA GGC AAA GGC ACA TCA AAA CG-3'               |
|                    | <i>BvM14-DHAR3as</i> : 5'-CCA CTA CAT GAC TAC CTG CAA ATC C-3'           |
|                    | <i>BvM14-DHAR3s</i> : 5'-CGGTTCTGACTCACTTCC-3'                           |
|                    | <i>BvM14-DHAR3as</i> : 5'-CAGCCAGCAACGACATCC-3'                          |
| <i>BvM14-MDHAR</i> | <i>BvM14-MDHARs</i> : 5'-TTT CTC TCT CAT CCT TCT TTC TCT G-3'            |
|                    | <i>BvM14-MDHARas</i> : 5'-ATT CTC AAT GTC ATC CAC ACA CTA C-3'           |
|                    | <i>BvM14-MDHARs</i> : 5'-CTGATATTGTGATTGTTGGTGTG-3'                      |
|                    | <i>BvM14-MDHARas</i> : 5'-AAGGCATCGGTCTTGATTCC-3'                        |
| <i>BvM14-APX</i>   | <i>BvM14-APXs</i> : 5'-CGC GGA TCC TCA CTC TCC AAT TTC TAG GGT TC-3'     |
|                    | <i>BvM14-APXas</i> : 5'-CCG CTC GAG CCT ACT ACA CAT TCC AAT CCA TCA C-3' |
|                    | <i>BvM14-APXs</i> : 5'-GTATGGAAGAGTGGAGGTGAC-3'                          |
|                    | <i>BvM14-APXas</i> : 5'-TAGATGTTGAGCAGGTGAAGG-3'                         |
| <i>BvM14-Trx</i>   | <i>BvM14-Trxs</i> : 5'-TTTCCTTGCTCAACACTAC-3'                            |
|                    | <i>BvM14-Trxas</i> : 5'-CAGCAACTTACTTAAGAGCCAG-3'                        |
|                    | <i>BvM14-Trxs</i> : 5'-ACAAGTTGAACACAGATGAATCC-3'                        |
|                    | <i>BvM14-Trxas</i> : 5'-GCACAGCACCAATAATACTCTC-3'                        |
| <i>BvM14-PrxR</i>  | <i>BvM14-PrxRs</i> : 5'-ATTCTTCAATGGCCCTCT-3'                            |
|                    | <i>BvM14-PrxRas</i> : 5'-AGAAGGGATAAAGGATTCACAG-3'                       |
|                    | <i>BvM14-PrxRs</i> : 5'-GGGAAGCCTGTTGTTGTTTAC-3'                         |
|                    | <i>BvM14-PrxRas</i> : 5'-TCATCACCCTAATAACCAATAACC-3'                     |
| <i>BvM14-GOX</i>   | <i>BvM14-GOXs</i> : 5'- GAGATGGAGGTCACCAATGTCAACG-3'                     |
|                    | <i>BvM14-GOXas</i> : 5'- TTATAGCTTCCATTATTTGTGCACAG-3'                   |
|                    | <i>BvM14-GOX-RTs</i> : 5'-TGGCACTGAGCGGTTGTC-3'                          |
|                    | <i>BvM14-GOX-RTas</i> : 5'-CGAGAAGAGCGAGGAGCATC-3'                       |
