# Supplementary figures and images for: Functional Characterization of Sugar Beet M14 Antioxidant Enzymes in Plant Salt Stress Tolerance
Source: MDPI journal article supplement (doi:10.3390/antiox12010057), 2022-12-27

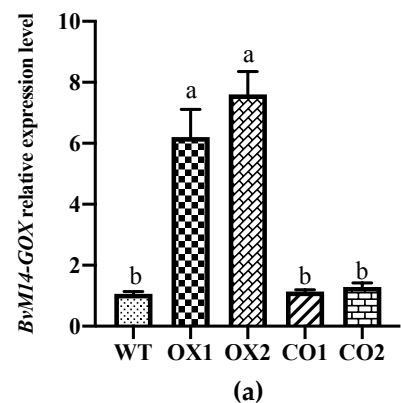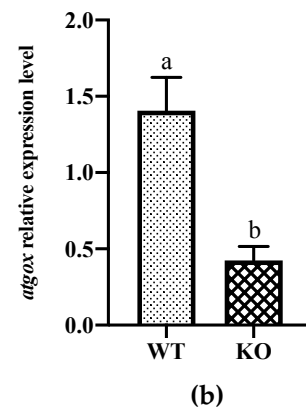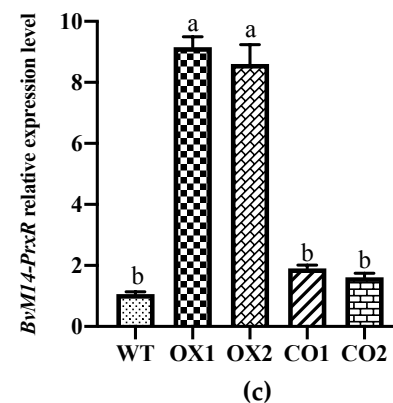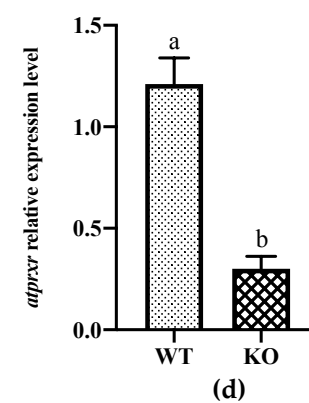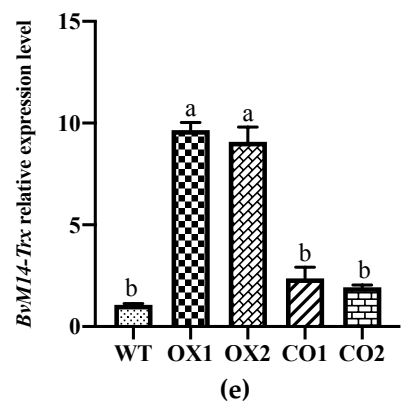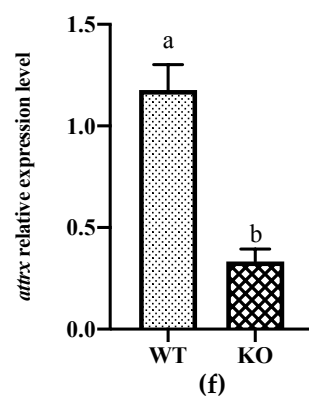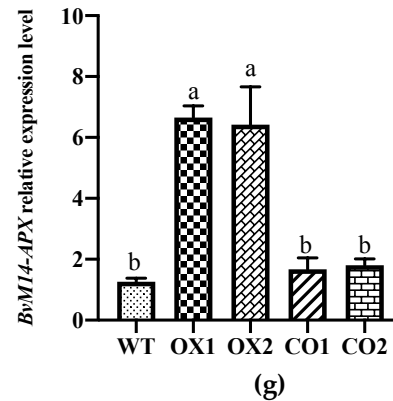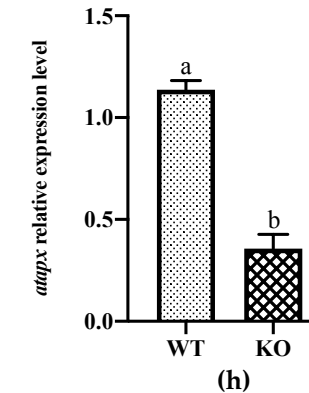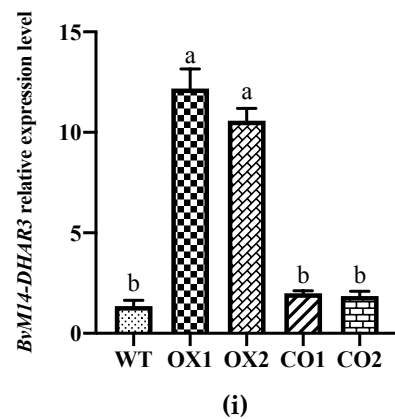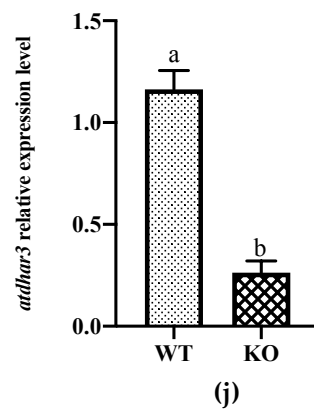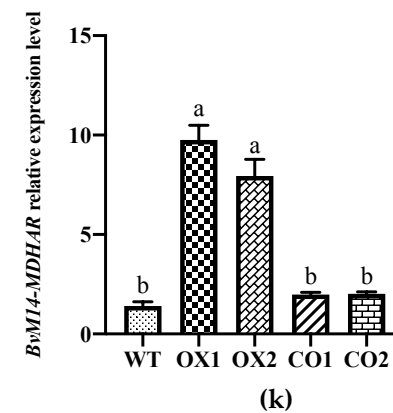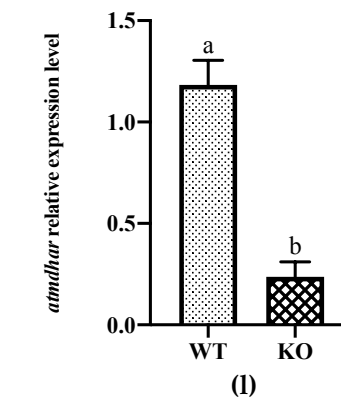

Figure S7

Supplement: s1 [file s1]

### *BvM14-Trx*

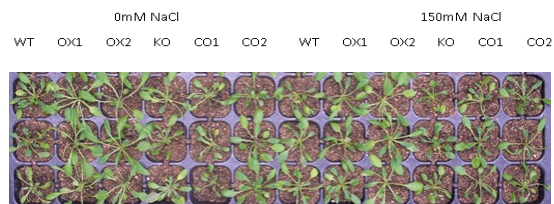

(a)

### *BvM14-PrxR*

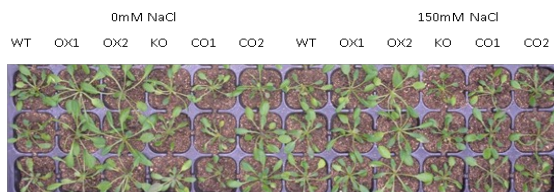

(b)

### *BvM14-GOX*

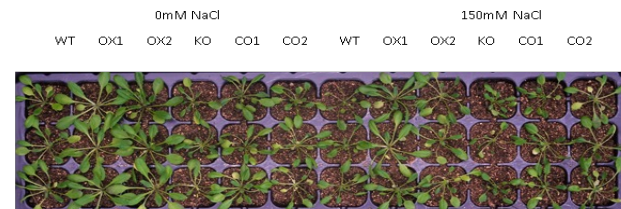

(c)

### *BvM14-Trx*

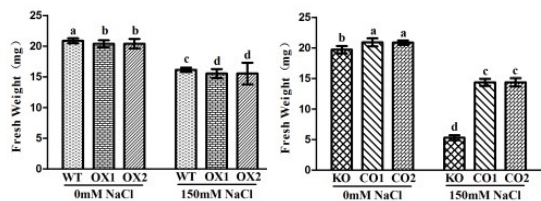

(d)

### *BvM14-PrxR*

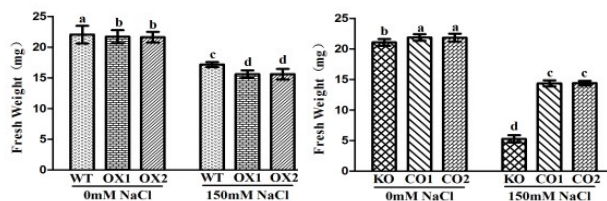

(e)

### *BvM14-GOX*

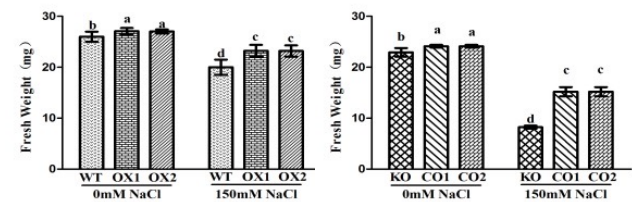

(f)

### *BvM14-Trx*

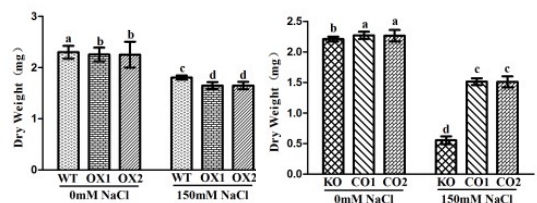

(g)

### *BvM14-PrxR*

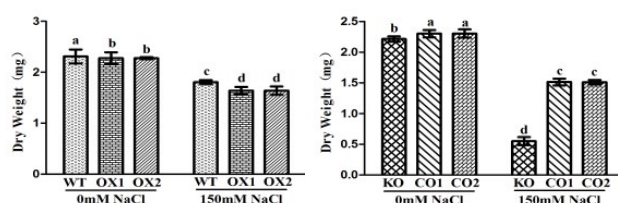

(h)

### *BvM14-GOX*

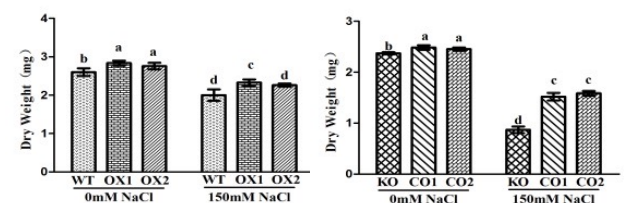

(i)

Figure S2

Supplement: s1 [file s1]

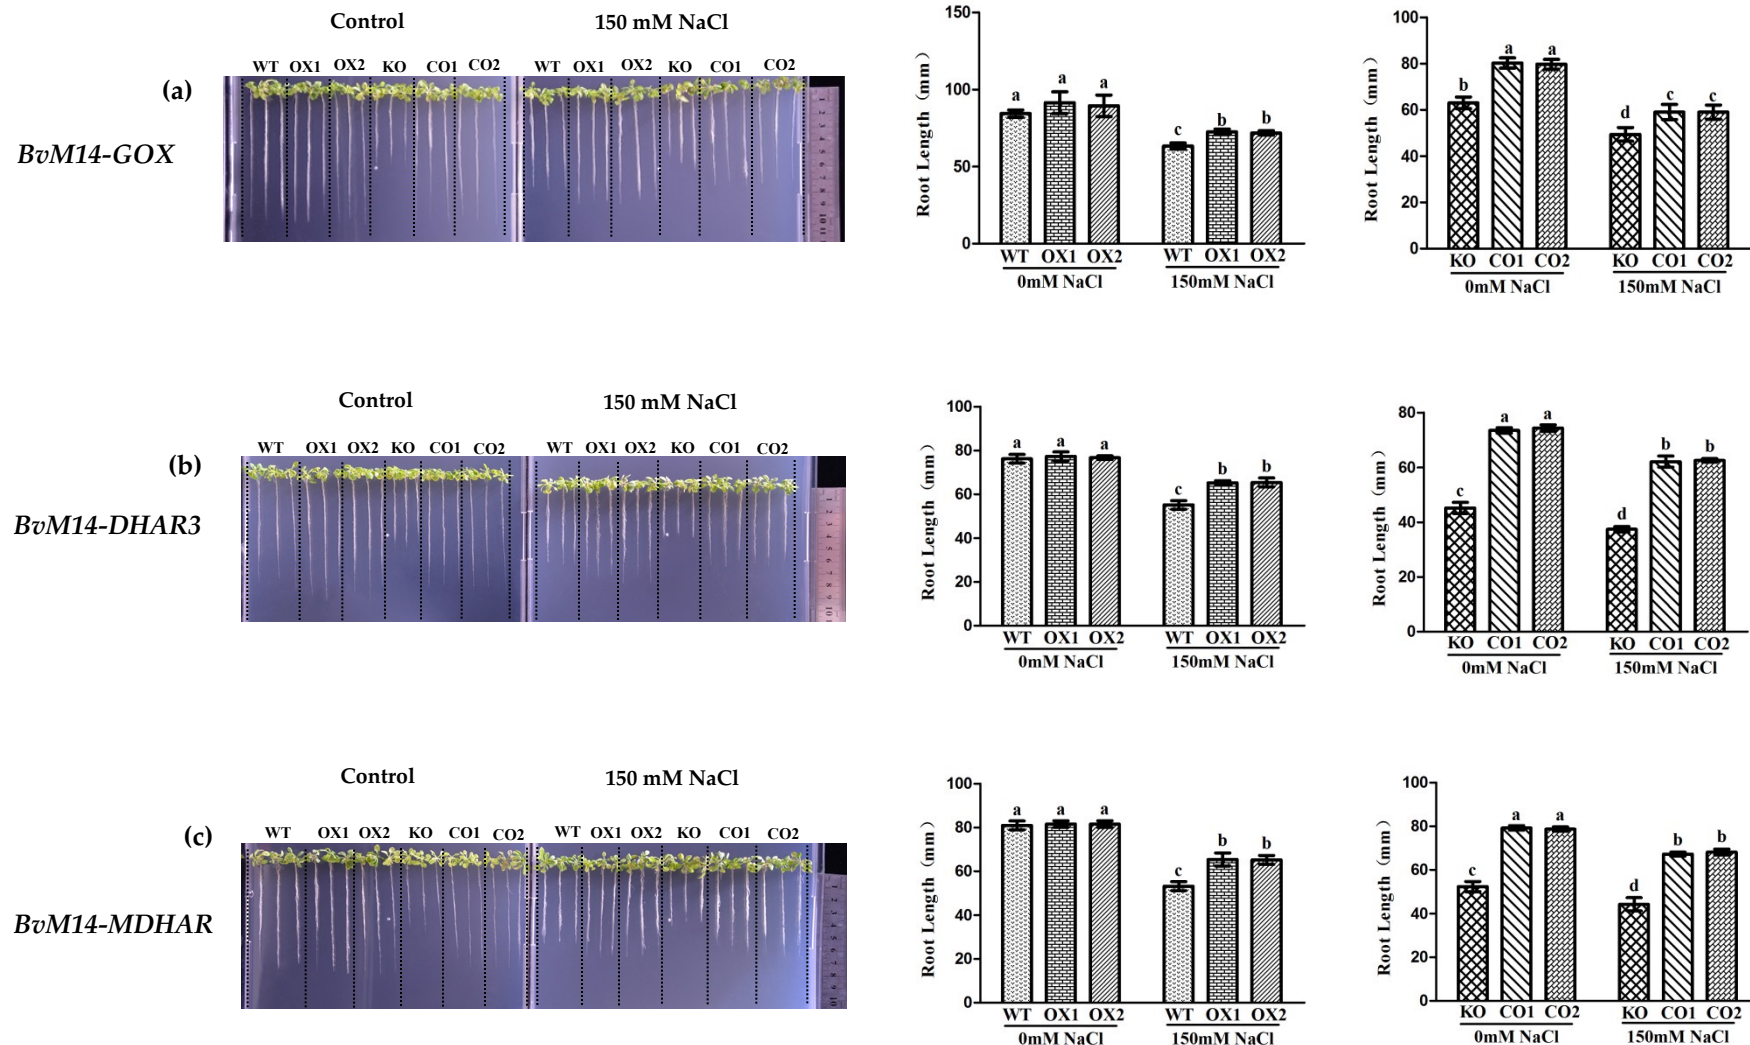

Figure S1

Supplement: s1 [file s1]

*BvM14-GOX*

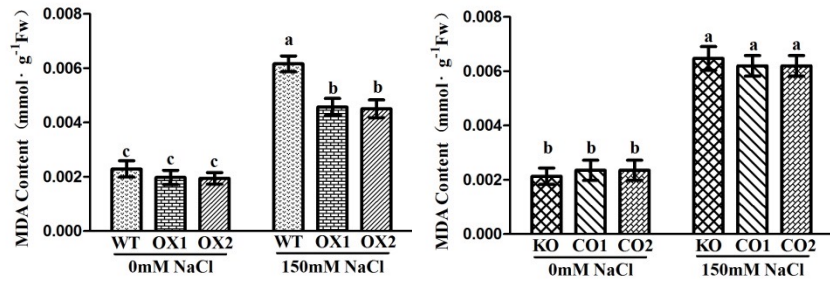

(a)

*BvM14-PrxR*

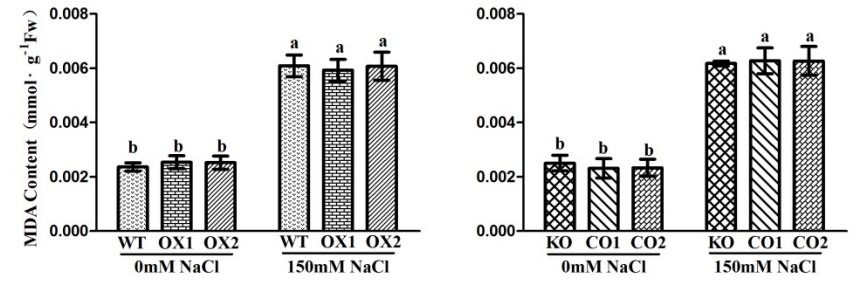

(b)

*BvM14-Trx*

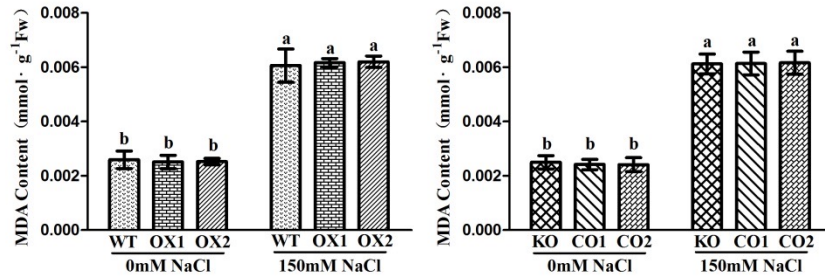

(c)

*BvM14-APX*

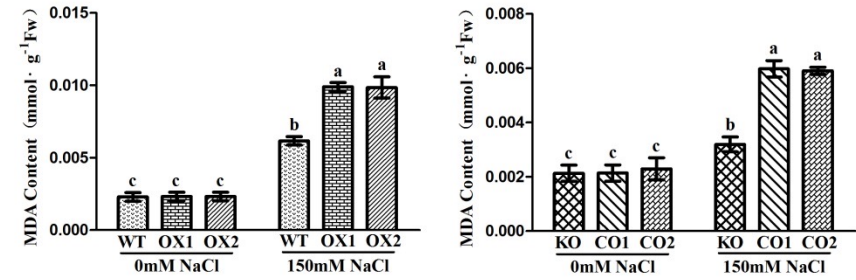

(d)

*BvM14-DHAR3*

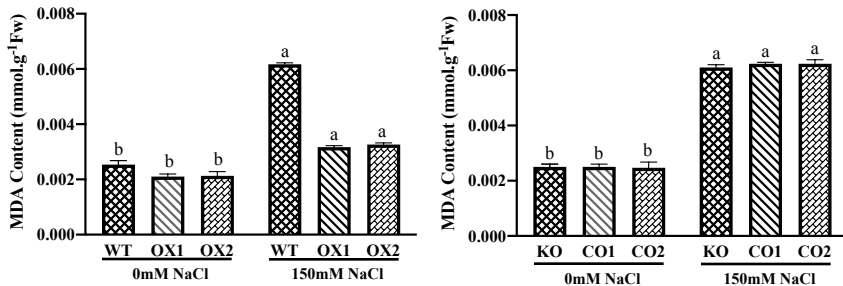

(e)

*BvM14-MDHAR*

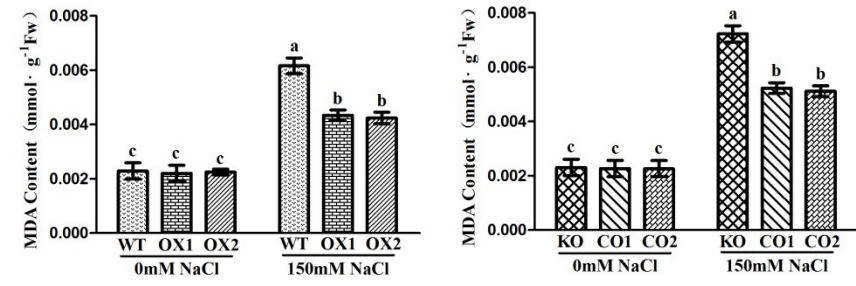

(f)

Figure S3

Supplement: s1 [file s1]

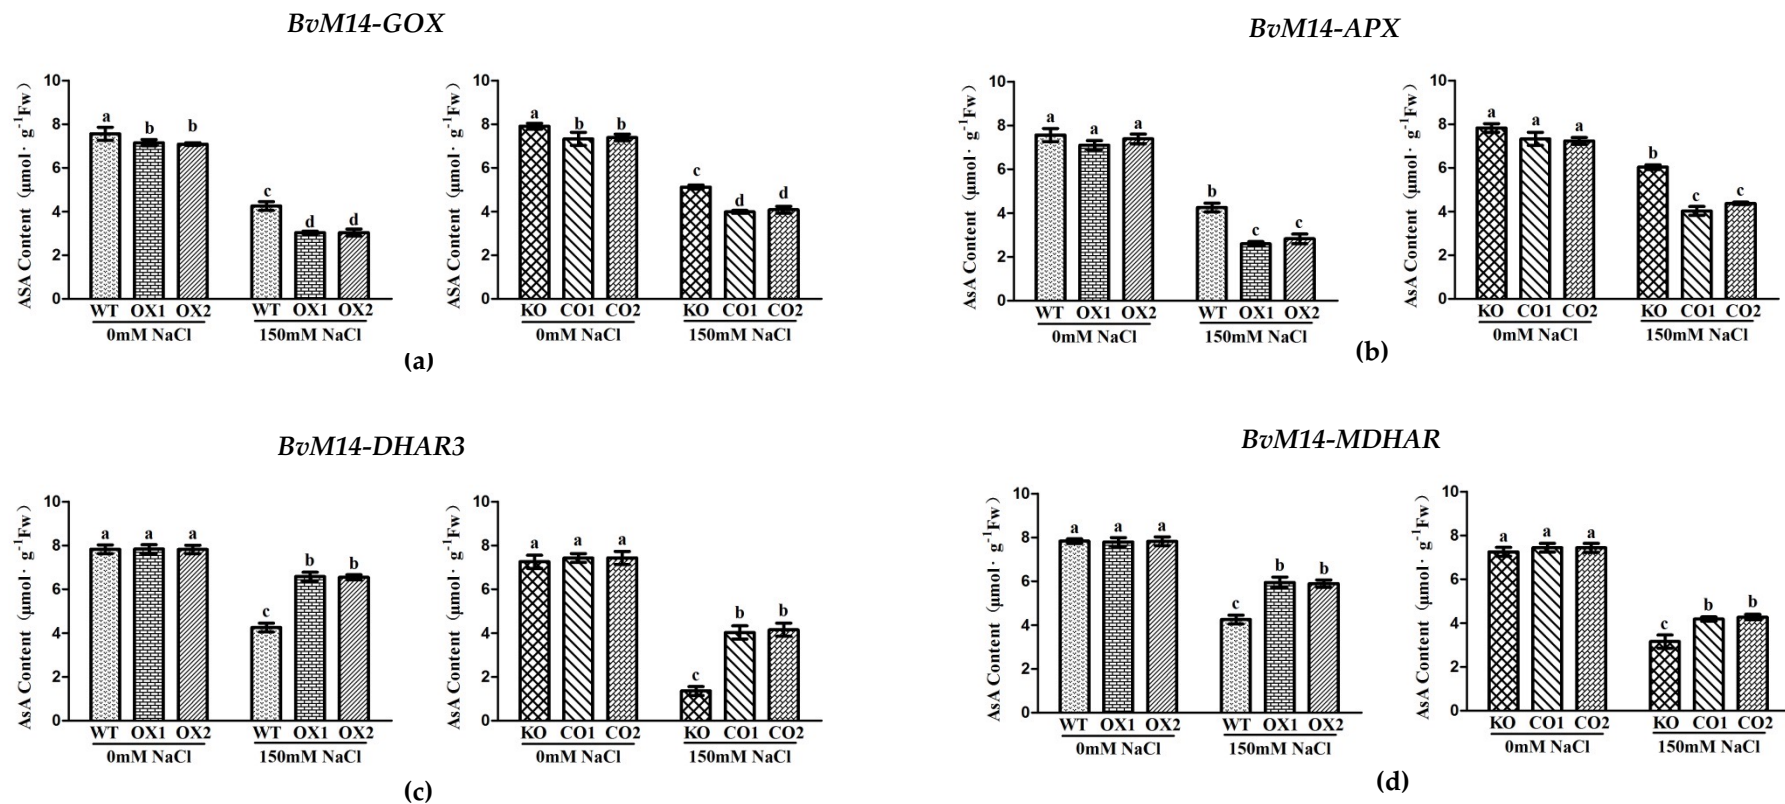

Figure S4

Supplement: s1 [file s1]
